# Supplementary material
Source: PubMed Central journal article supplement (PMC5919818)
Supplement: jci-128-97739-s001.pdf [file jci-128-97739-s001.pdf]

## SUPPLEMENTARY DATA

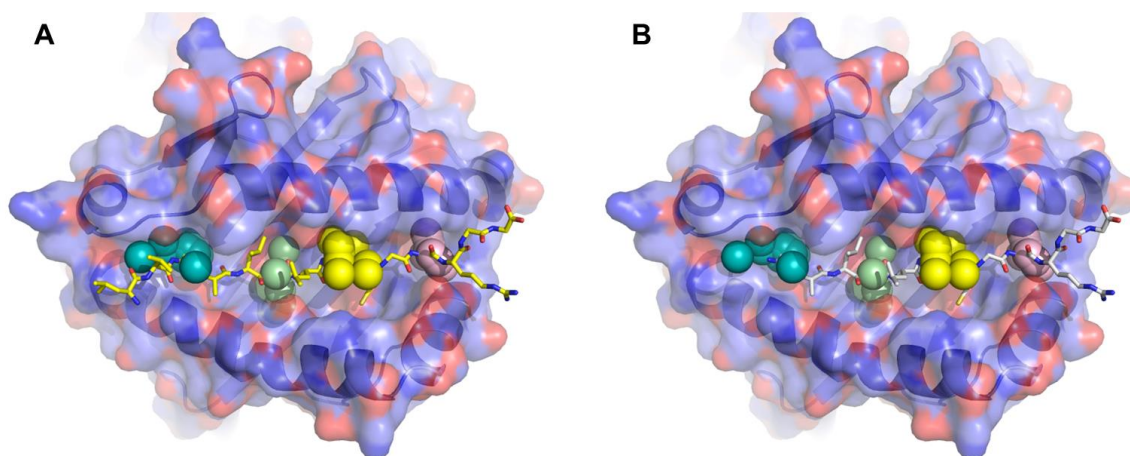**Supplemental Figure 1. Molecular models of insulin B chain peptides bound to HLA-DQ8.**

(A) Insulin B chain amino acids 11-23 (B:11-23) and (B) B:13-23 bound to DQ8. The sites of interaction between the amino acids of the peptide to DQ8 are identical for both insulin peptides.

Pockets 1, 4, 6 and 9 are depicted by colored spheres.

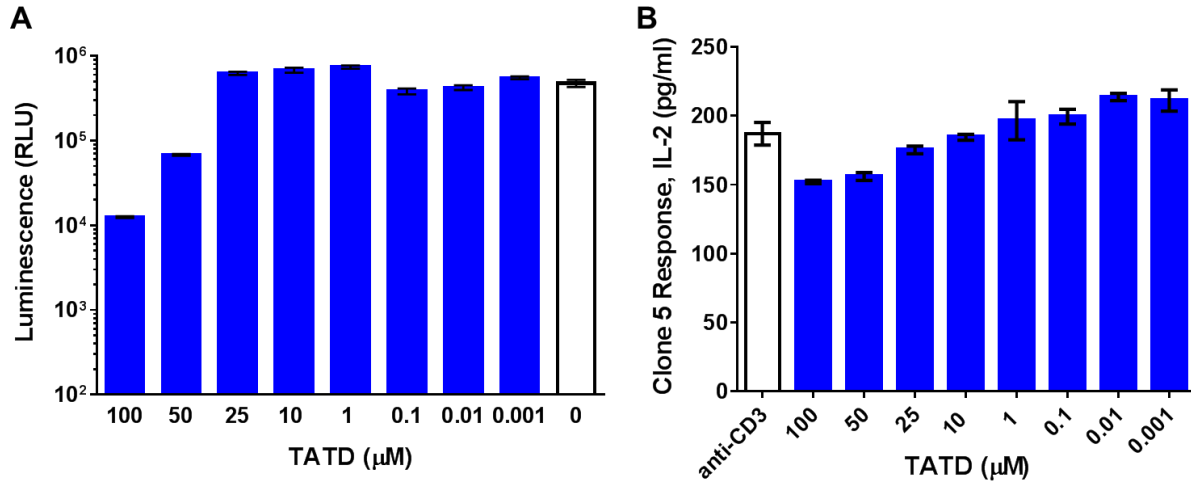

**Supplemental Figure 2. Effects of TATD on in vitro cell viability and on CD3 stimulated T-cells.** (A) The T-cell receptor transductant (Clone 5) was cultured in the presence of DQ8-transgenic spleen cells, insulin B:13-23 peptide and different concentrations of TATD. Cell viability was assessed with a luminescence assay that detects viable cells in culture. RLU = relative light units. (B) Clone 5 was cultured with an anti-CD3 stimulating monoclonal antibody in the presence and absence of TATD. After overnight culture, secreted IL-2 was measured in the supernatant. Data are shown as mean  $\pm$  SEM and are representative of at least three independent experiments.

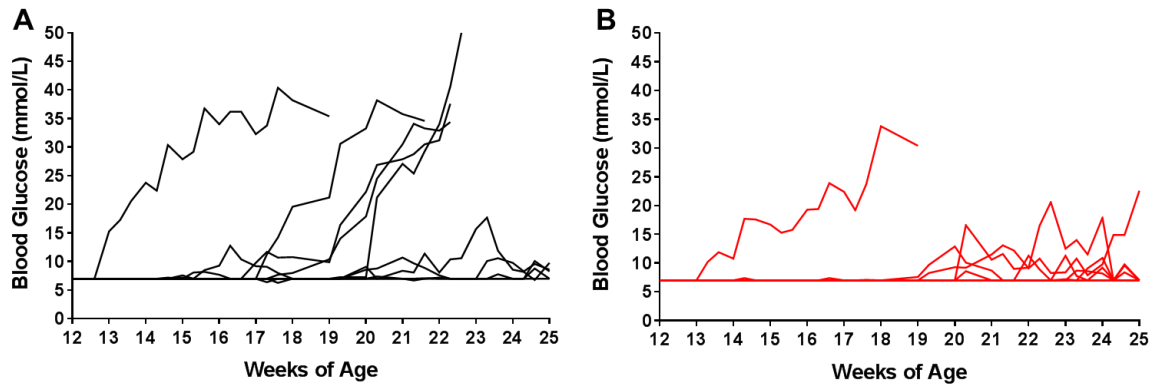

**Supplemental Figure 3. TATD treatment late in the NOD disease course maintains normal blood glucose levels.** Individual blood glucose data for female mice treated with (A) PBS (n=10) by intraperitoneal injection twice weekly or (B) TATD (n=9) 30mg oral gavage daily beginning at 12 weeks of age and concluding at 25 weeks. In the PBS group 6/10 mice developed overt diabetes, while 3/9 TATD treated mice developed diabetes; diabetes is defined as consecutive blood glucoses >14 mmol/L. Each line represents an individual mouse.

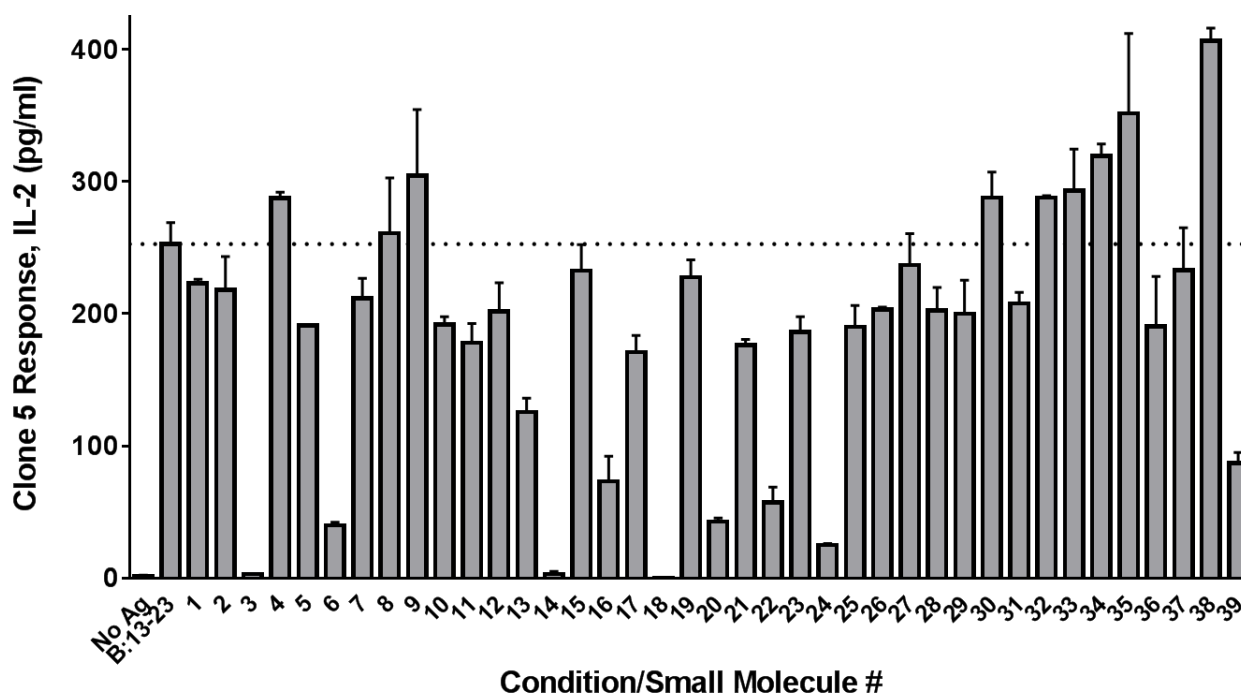

**Supplemental Figure 4. In vitro screening of Food and Drug Administration (FDA) approved drugs to pocket 6 of HLA-DQ8.** Clone 5 was cultured with insulin B:13-23 peptide plus individual small molecule drugs at 100 $\mu$ M in the presence of DQ8-transgenic mouse splenocytes as antigen presenting cells. Secreted IL-2 was measured in the cell culture supernatant after overnight culture using a highly sensitive ELISA assay. Numbers 1-39 depict tested compounds and responses are shown as mean  $\pm$  SEM; chemical structures are listed in Supplemental Table 5. No Ag = no antigen. Dotted line is at the IL-2 response to insulin B:13-23 alone.

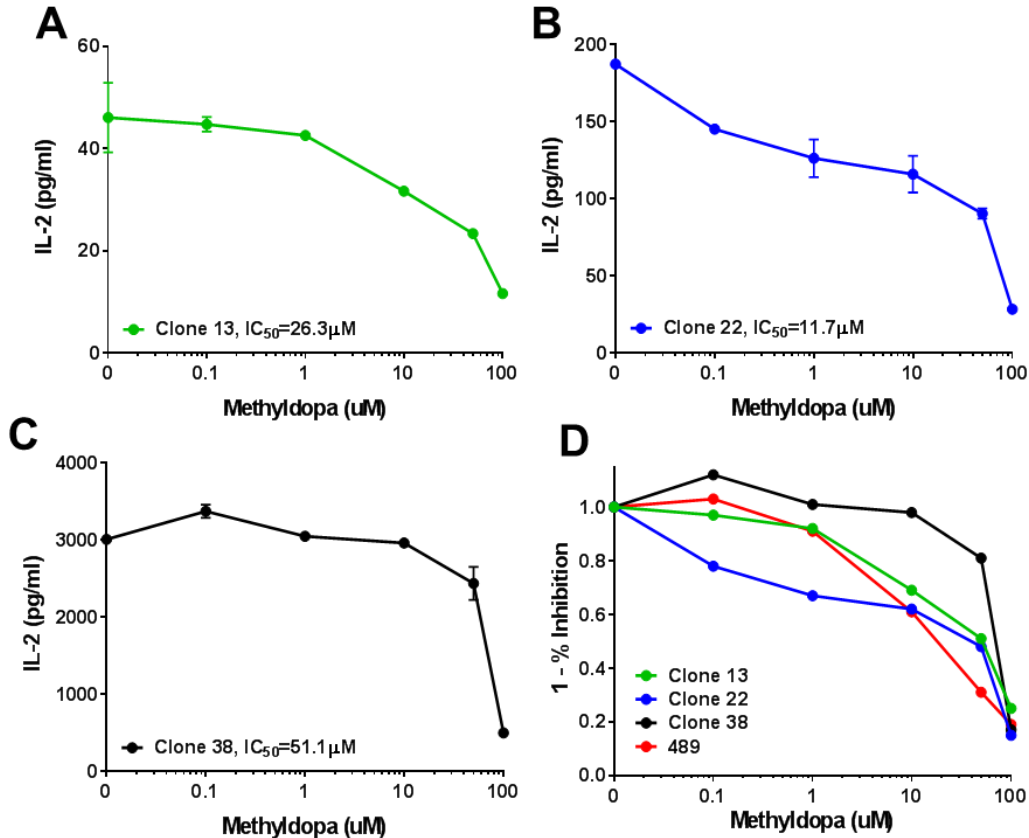

**Supplemental Figure 5. Methyldopa inhibits multiple T-cell receptor (TCR) transductants restricted to the same peptide/DQ8 complex.** TCR transductants were produced from the TCR  $\alpha/\beta$  gene sequences for T-cell clones restricted to  $\alpha$ -gliadin<sub>228-240</sub>/DQ8; all TCR transductants respond to the double deamidated peptide SGE $\underline{G}$ SFQPSQ $\underline{E}$ NP. **(A)** Clone 13, **(B)** Clone 22 and **(C)** Clone 38 are all inhibited with the in vitro addition of methyldopa to varying degrees (different IC<sub>50</sub> values) despite different levels of IL-2 response to  $\alpha$ -gliadin/DQ8. **(D)** Comparison of percent inhibition with methyldopa for the four TCR transductants including 489 with that inhibition curve depicted in Fig. 3C. Data is shown as mean  $\pm$  SEM and representative of at least three independent experiments.

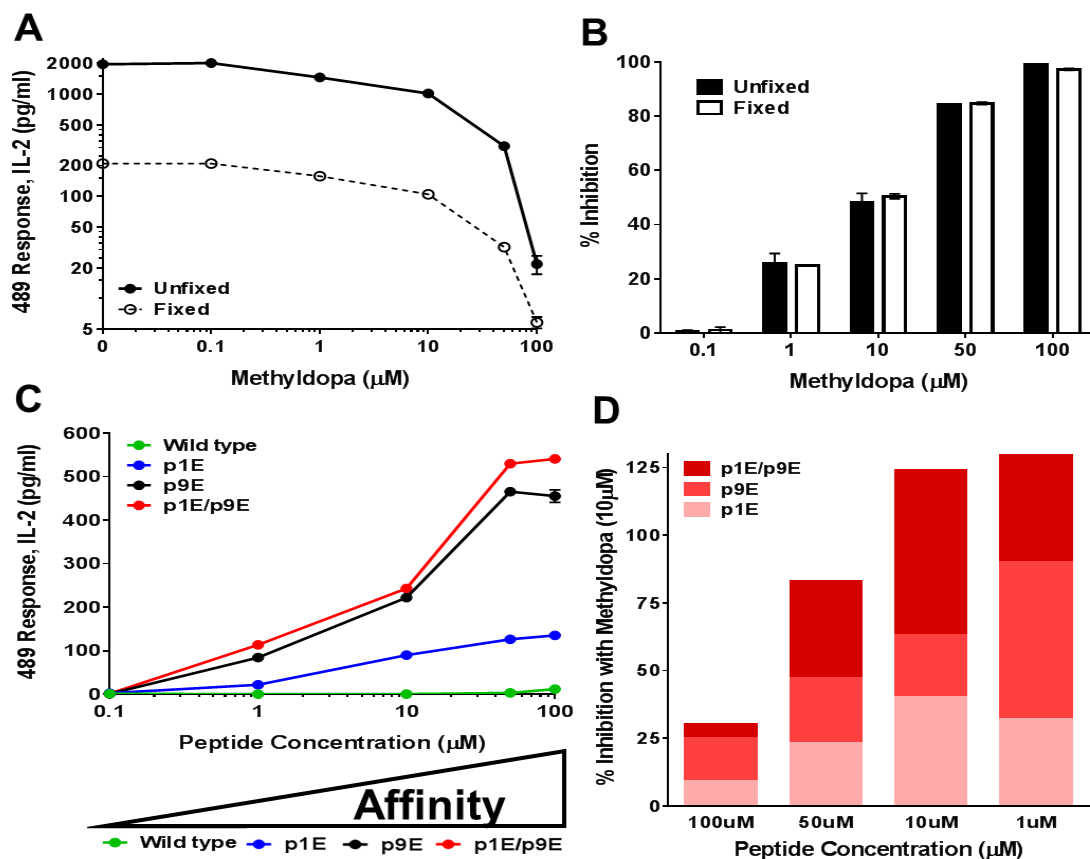

**Supplemental Figure 6. Methyldopa acts on the cell surface to inhibit a TCR response based upon peptide affinity for DQ8.** Artificial antigen presenting cells (APCs) expressing DQ8 (murine B cell line, M12C3, transduced with DQ8) were fixed with glutaraldehyde to prevent intracellular antigen processing. **(A)** Methyldopa inhibits 489 response in the presence of deamidated  $\alpha$ -gliadin (10 $\mu\text{M}$ ) with both fixed and unfixed APCs. **(B)** The percentage of inhibition is similar between fixed and unfixed APCs. **(C)** 489 responds to a dose titration of  $\alpha$ -gliadin<sub>228-240</sub> peptides presented by unfixed DQ8 APCs with a hierarchy of response based upon the number and position of deamidations (Q $\rightarrow$ E). **(D)** 489 was cultured in the presence of DQ8 APCs with different peptide concentrations plus a fixed amount of methyldopa (10 $\mu\text{M}$ ); the percentage of inhibition for a given peptide is depicted at each in vitro concentration. Data is shown as mean  $\pm$  SEM representative of at least three independent experiments.

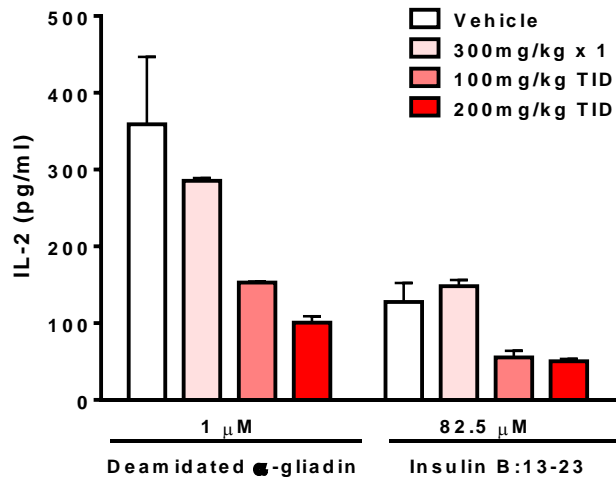

**Supplemental Figure 7. In vivo dose finding studies with methyldopa in DQ8-transgenic mice.** DQ8-transgenic mice were gavaged with vehicle or defined dose(s) of methyldopa in a 24 hour time period (n=2 per group). Ex vivo splenocytes were then used as APCs to present a deamidated α-gliadin peptide or insulin B:13-23 to 489 or Clone 5, respectively, with secreted IL-2 measured as the readout. No methyldopa was added to the in vitro culture. The concentration of in vitro added peptide is shown on the graph. Data are shown as mean ± SEM.

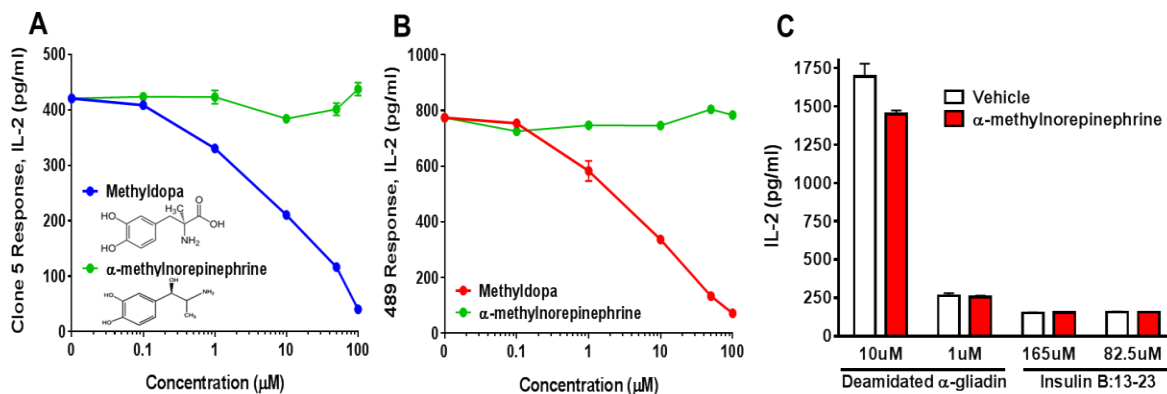

**Supplemental Figure 8. A metabolite of methyldopa,  $\alpha$ -methylnorepinephrine, does not block DQ8 restricted T-cell responses in vitro or in vivo.**  $\alpha$ -methylnorepinephrine is a major metabolite of methyldopa, which agonizes central  $\alpha_2$  adrenergic receptors resulting in blood pressure lowering. The metabolite is structurally similar to methyldopa but does not block (A) Clone 5 or (B) 489 when dose titrated into T-cell receptor transductant stimulation assays. Dose titrations of methyldopa were performed in the same assays. Data is shown as mean  $\pm$  SEM and representative of at least three independent experiments. (C) DQ8-tansgenic mice were gavaged with vehicle (n=4) or 50mg/kg  $\alpha$ -methylnorepinephrine (n=3) three times daily for four days. Their ex vivo splenocytes were used as APCs to present different concentrations of deamidated  $\alpha$ -gliadin or insulin B:13-23 to 489 or Clone 5, respectively. Data is shown as mean  $\pm$  SEM.



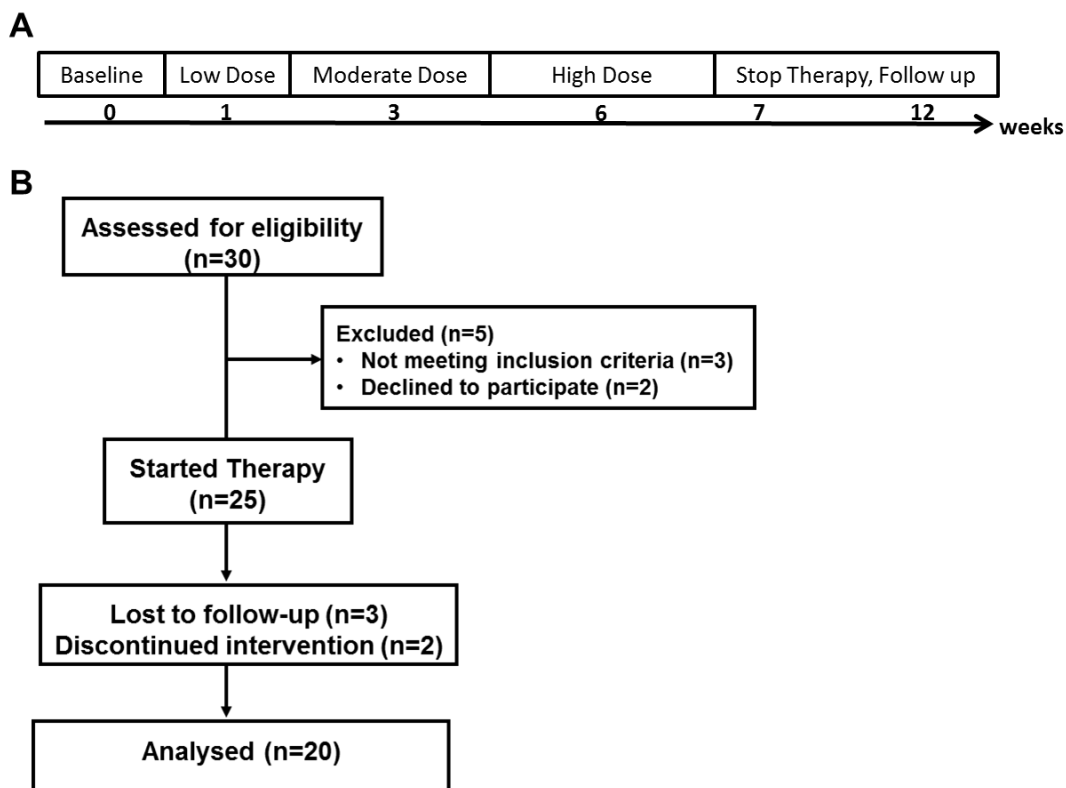

**Supplemental Figure 9. Schema of study design with visits and consort flow diagram. (A)**

The methyldopa intervention study was designed as a single-arm open-label dose escalation trial. Main inclusion criteria included American Diabetes Association diagnostic criteria for type 1 diabetes within the last 2 years, ages 18-45 years old, HLA-DQ8 (DQA1\*03:01-DQB1\*03:02) present and random C-peptide  $\geq 0.1$  ng/ml (a measure of residual endogenous insulin production). Each study participant served as their own control and there were 6 visits over a 12-week time period. All participants self-administered oral methyldopa (Aldomet) 500mg tablets at three separate doses: low dose = 500mg twice daily, moderate dose = 500mg three times daily and high dose = 2-3 grams divided daily. These doses did not exceed the maximum recommended doses for use as an antihypertensive agent. **(B)** Consort diagram of study participants assessed for eligibility, allocated to treatment, follow-up and analyzed. Three study participants were lost to follow-up and two withdrew from the study due to time constraints.

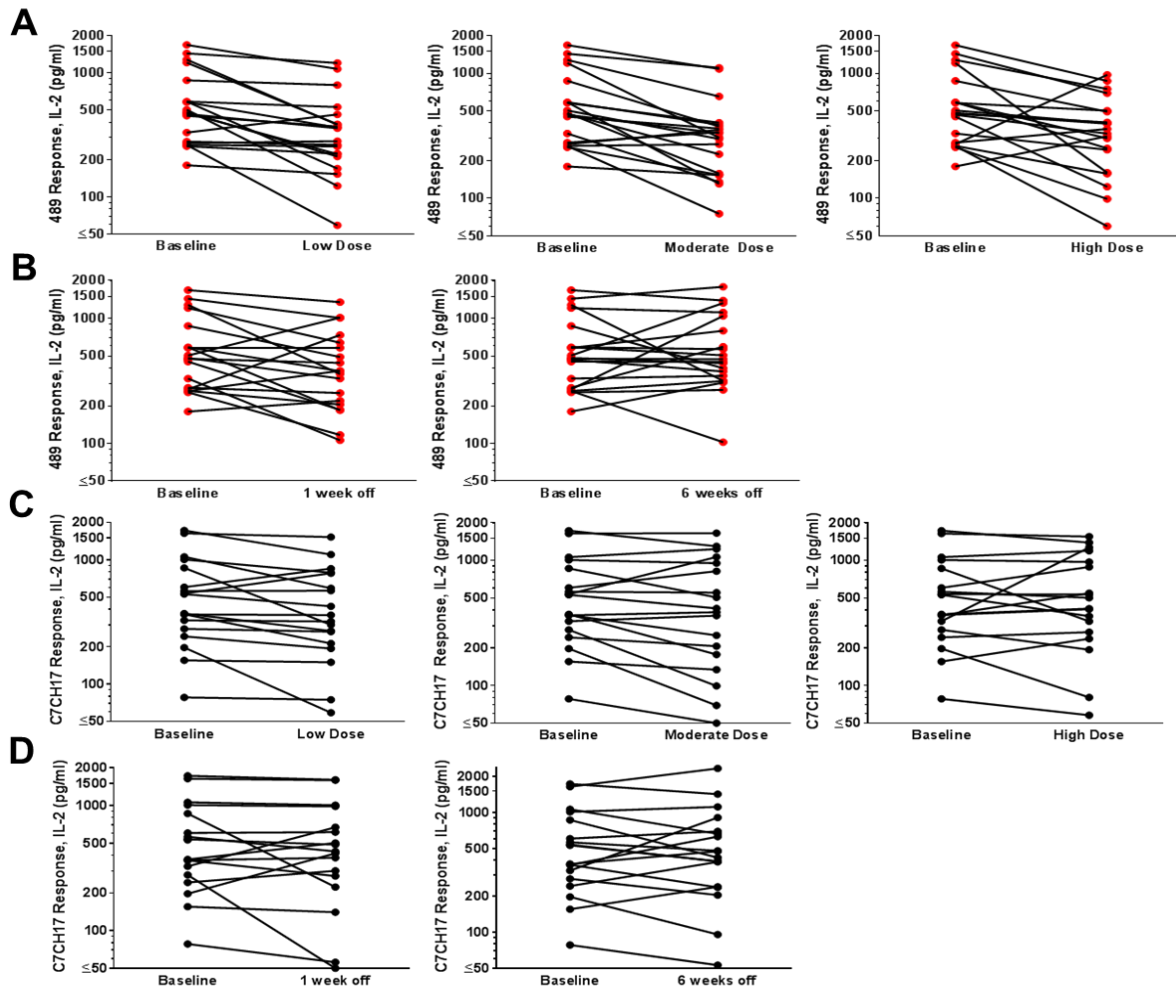

**Supplemental Figure 10. Methyldopa treatment specifically blocks DQ8 antigen presentation in peripheral blood mononuclear cells from recent-onset type 1 diabetes patients with the DQ8 allele.** Participants' cryopreserved peripheral blood mononuclear cells were used as antigen presenting cells to present cognate peptide to a given T-cell receptor (TCR) transductant. Secreted IL-2 after overnight culture was measured with a sensitive ELISA assay. Individual study subject responses to (**panel A**) 489 (TCR transductant restricted to deamidated  $\alpha$ -gliadin/DQ8) comparing baseline to different drug doses and (**panel B**) baseline to time points off drug. Individual subject responses to (**panel C**) C7CH17 (TCR transductant restricted to HA<sub>306-318</sub>/DR4) comparing baseline to drug doses and (**panel D**) baseline to time points off drug. Data are shown as a mean from triplicate wells at each time point during the study. Lines connect the same study participant.

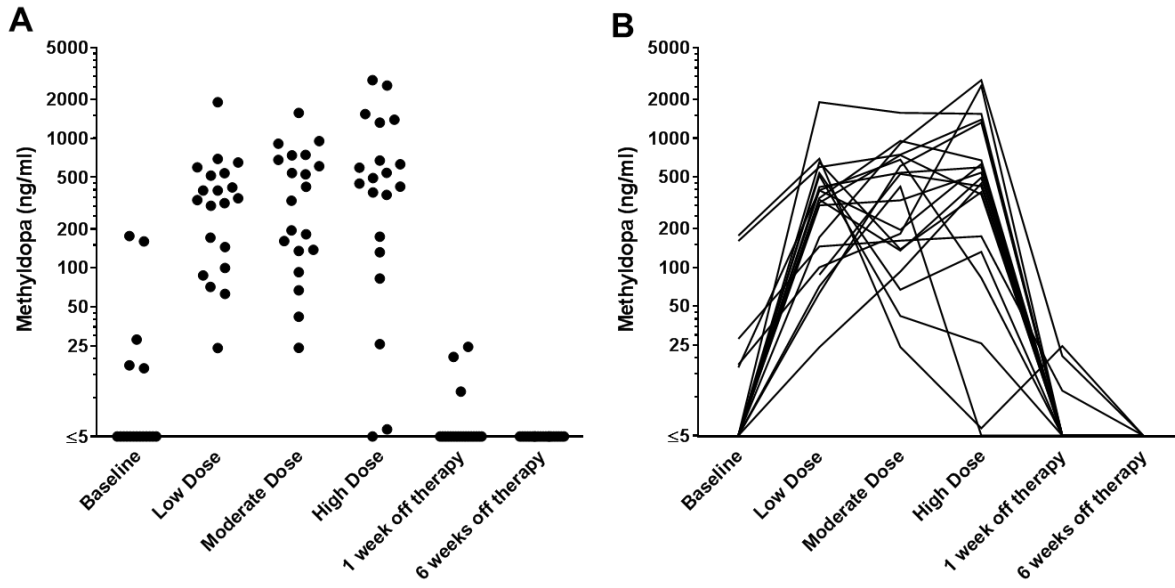

**Supplemental Figure 11. Methyldopa levels measured from plasma of study participants.**

Using liquid chromatography tandem mass spectrometry (LCMS), standard curves were generated for methyldopa and positive ion electrospray ionization mass spectra were obtained for each study sample (1:1 phosphate buffered saline diluted plasma). Sample collection was not timed to the last study drug administration; these assays were done to assess compliance with taking methyldopa during the study. **(A)** Methyldopa levels from study subjects at each of the six study visits. **(B)** Individual measurements throughout the study. Lower limit of detection  $\leq 5$  ng/ml. Low dose = 500mg twice daily, moderate dose = 500mg three time daily and high dose = 2-3 grams divided daily.

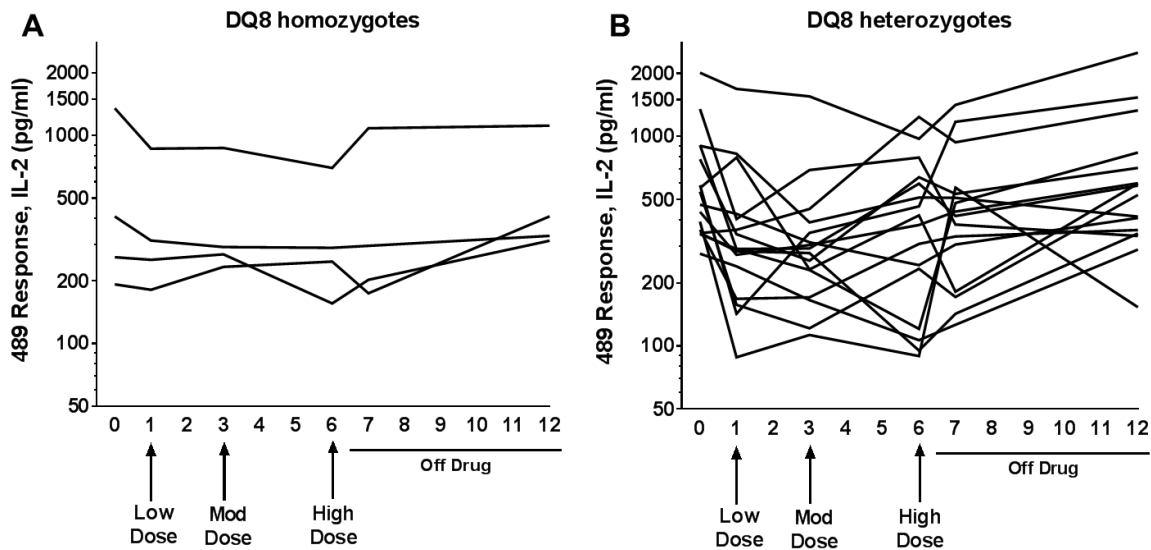

**Supplemental Figure 12. DQ8 dose effect on the ability to block DQ8 antigen presentation in methyldopa treated study participants.** Comparison of (A) DQ8 homozygotes (n=4) to (B) heterozygotes (n=16) in terms of response to the 489 T-cell receptor (TCR) transductant, which is restricted to deamidated  $\alpha$ -gliadin/DQ8, throughout the study. Participants' cryopreserved peripheral blood mononuclear cells were used as antigen presenting cells to present cognate peptide to the 489 TCR transductant. Secreted IL-2 after overnight culture was measured with a sensitive ELISA assay. Each line represents an individual study participant.

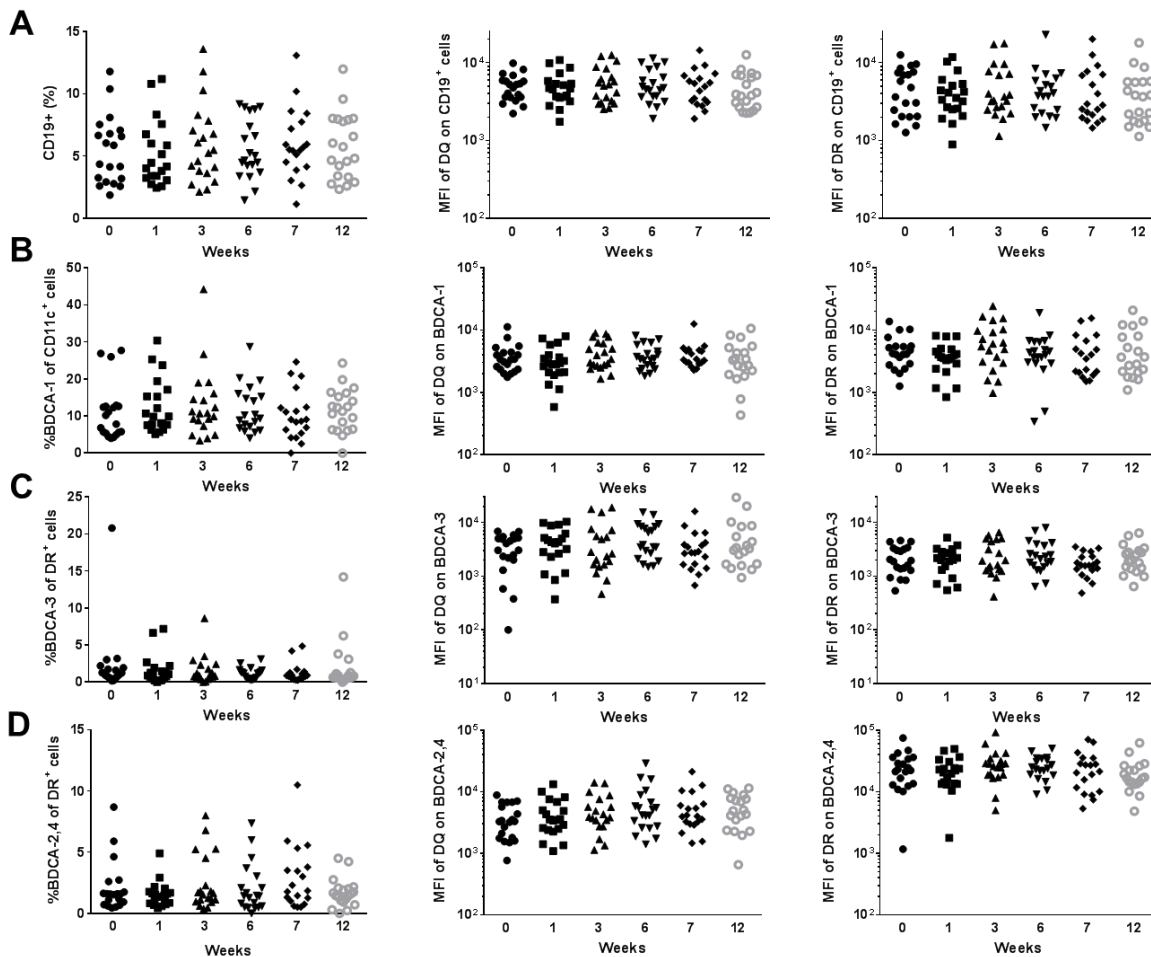

**Supplemental Figure 13. Flow cytometry analysis of antigen presenting cells in the peripheral blood of methyldopa treated subjects throughout the study.** Freshly isolated peripheral blood mononuclear cells were stained for cell surface markers corresponding to (**panel A**) B-cells, (**panels B, C**) myeloid dendritic cells and (**panel D**) plasmacytoid dendritic cells. Each panel shows the percentage of antigen presenting cells, followed by the mean fluorescent intensity of DQ and DR on the cell population.

**Supplemental Table 1.** HLA-DQ8 pocket 1 top scoring in silico small molecules from the NIH Developmental Therapeutics Program chemical repository that were screened in vitro.

| Number | NSC Identifier* | Chemical Structure                                                                  | PubChem CID | Molecular docking score (rank) |
|--------|-----------------|-------------------------------------------------------------------------------------|-------------|--------------------------------|
| 1      | 138669          | 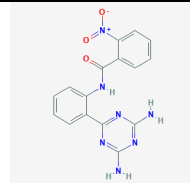   | 421786      | -35.6<br>(#2)                  |
| 2      | 46611           |    | 5856603     | -34.3<br>(#3)                  |
| 3**    | 45552           |    | 23679260    | -32.8<br>(#4)                  |
| 4      | 68045           |   | 412541      | -32.4<br>(#5)                  |
| 5      | 24947           |  | 68494       | -31.3<br>(#7)                  |
| 6      | 96656           |  | 262721      | -31.3<br>(#8)                  |
| 7      | 166346          |  | 54602266    | -31.2<br>(#9)                  |
| 8      | 146785          |  | 54608366    | -31.2<br>(#10)                 |

|    |        |                                                                                     |          |                |
|----|--------|-------------------------------------------------------------------------------------|----------|----------------|
| 9  | 52151  | 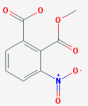   | 243002   | -31.2<br>(#11) |
| 10 | 29033  |    | 54609354 | -31.0<br>(#12) |
| 11 | 157411 |    | 291857   | -30.8<br>(#13) |
| 12 | 7420   |    | 222105   | -30.7<br>(#14) |
| 13 | 334078 |   | 909      | -30.6<br>(#15) |
| 14 | 25857  |  | 230714   | -30.5<br>(#16) |
| 15 | 624899 |  | 361681   | -30.5<br>(#17) |
| 16 | 402434 |  | 53598    | -30.4<br>(#18) |
| 17 | 18694  |  | 227247   | -30.2<br>(#19) |

|    |        |                                                                                     |          |                |
|----|--------|-------------------------------------------------------------------------------------|----------|----------------|
| 18 | 168957 | 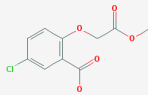   | 297698   | -30.2<br>(#20) |
| 19 | 236671 |    | 5458452  | -30.2<br>(#21) |
| 20 | 241483 |    | 315734   | -30.2<br>(#22) |
| 21 | 137635 |    | 54610224 | -30.1<br>(#23) |
| 22 | 194985 |   | 73007    | -30.1<br>(#24) |
| 23 | 84120  |  | 6143498  | -30.1<br>(#25) |
| 24 | 1582   |  | 5921960  | -29.9<br>(#26) |
| 25 | 265215 |  | 5244562  | -29.8<br>(#28) |
| 26 | 16675  |  | 408896   | -29.8<br>(#29) |



|    |        |                                                                                     |          |                |
|----|--------|-------------------------------------------------------------------------------------|----------|----------------|
| 27 | 53040  |    | 243357   | -29.7<br>(#30) |
| 28 | 47043  |    | 240618   | -29.8<br>(#31) |
| 29 | 83255  |    | 97417    | -29.6<br>(#32) |
| 30 | 310778 |    | 5384166  | -29.6<br>(#33) |
| 31 | 501532 |   | 349999   | -29.5<br>(#34) |
| 32 | 9798   |  | 66787    | -29.5<br>(#35) |
| 33 | 344501 |  | 9573814  | -29.4<br>(#36) |
| 34 | 366390 |  | 339510   | -29.4<br>(#37) |
| 35 | 156622 |  | 54610506 | -29.4<br>(#38) |

|    |        |                                                                                   |         |                |
|----|--------|-----------------------------------------------------------------------------------|---------|----------------|
| 36 | 163632 | 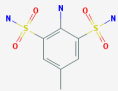 | 294715  | -29.3<br>(#39) |
| 37 | 118753 |  | 273483  | -29.3<br>(#40) |
| 38 | 16686  |  | 5354666 | -29.3<br>(#41) |
| 39 | 176297 |  | 6377127 | -29.3<br>(#42) |

\*NSC (National Service Center) identifiers for substances submitted to the National Cancer Institute, Developmental Therapeutics Program. Website to obtain further compound information (<https://dtp.cancer.gov/dtpstandard/ChemData/index.jsp>).

\*\*Increased T-cell response in the screening assay above that of insulin peptide alone; presence of peptide was necessary to elicit an IL-2 response.

**Supplemental Table 2.** HLA-DQ8 pocket 4 top scoring in silico small molecules from the NIH Developmental Therapeutics Program chemical repository that were screened in vitro.

| Number | NSC Identifier* | Chemical Structure                                                                  | PubChem CID | Molecular docking score (rank) |
|--------|-----------------|-------------------------------------------------------------------------------------|-------------|--------------------------------|
| 1      | 44456           | 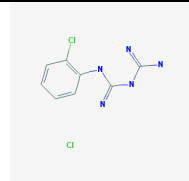   | 2730222     | -37.9<br>(#1)                  |
| 2      | 34785           |    | 20322       | -35.9<br>(#2)                  |
| 3      | 172832          |    | 425320      | -35.8<br>(#3)                  |
| 4      | 1529            |   | 54611695    | -35.4<br>(#4)                  |
| 5      | 129578          |  | 279241      | -35.0<br>(#5)                  |
| 6      | 116532          |  | 272244      | -35.0<br>(#6)                  |
| 7      | 206150          |  | 427023      | -34.7<br>(#7)                  |
| 8      | 35895           |  | 411794      | -34.7<br>(#8)                  |

|    |        |                                                                                     |          |                |
|----|--------|-------------------------------------------------------------------------------------|----------|----------------|
| 9  | 91090  | 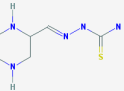   | 9552109  | -34.0<br>(#10) |
| 10 | 62497  |    | 3053359  | -33.5<br>(#11) |
| 11 | 40588  |    | 412620   | -33.4<br>(#12) |
| 12 | 132372 |    | 40466    | -33.2<br>(#13) |
| 13 | 112772 |   | 24190696 | -33.1<br>(#14) |
| 14 | 69188  |  | 3862     | -33.1<br>(#15) |
| 15 | 167746 |  | 24194385 | -33.1<br>(#16) |
| 16 | 157959 |  | 5717606  | -33.0<br>(#17) |
| 17 | 137950 |  | 24192331 | -32.9<br>(#18) |

|    |        |                                                                                                              |          |                |
|----|--------|--------------------------------------------------------------------------------------------------------------|----------|----------------|
| 18 | 374666 | 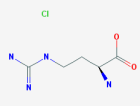 <chem>NC(=O)NCCCl</chem>   | 24200451 | -32.9<br>(#19) |
| 19 | 35894  |  <chem>NC(=O)NCCCl</chem>   | 6332033  | -32.8<br>(#20) |
| 20 | 319055 |  <chem>NC(=O)NCCCl</chem>   | 330454   | -32.7<br>(#21) |
| 21 | 19006  |  <chem>NC(=O)NCCCl</chem>   | 227431   | -32.6<br>(#22) |
| 22 | 85786  |  <chem>NC(=O)NCCCl</chem>  | 5127022  | -32.5<br>(#23) |
| 23 | 89799  |  <chem>NC(=O)NCCCl</chem> | 9568312  | -32.3<br>(#24) |
| 24 | 137952 |  <chem>NC(=O)NCCCl</chem> | 421691   | -32.2<br>(#25) |
| 25 | 137975 |  <chem>NC(=O)NCCCl</chem> | 5752031  | -32.1<br>(#27) |
| 26 | 49798  |  <chem>NC(=O)NCCCl</chem> | 413577   | -32.1<br>(#28) |

|    |        |                                                                                     |          |                |
|----|--------|-------------------------------------------------------------------------------------|----------|----------------|
| 27 | 36872  | 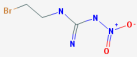   | 412037   | -31.9<br>(#29) |
| 28 | 10386  |    | 79438    | -31.9<br>(#30) |
| 29 | 320034 |    | 24199275 | -31.7<br>(#31) |
| 30 | 24527  |    | 12562407 | -31.5<br>(#33) |
| 31 | 34697  |   | 411483   | -31.5<br>(#34) |
| 32 | 354435 |  | 434666   | -31.5<br>(#35) |
| 33 | 603628 |  | 353977   | -31.5<br>(#36) |
| 34 | 206289 |  | 865      | -31.4<br>(#37) |

\*NSC (National Service Center) identifiers for substances submitted to the National Cancer Institute, Developmental Therapeutics Program. Website to obtain further compound information (<https://dtp.cancer.gov/dtpstandard/ChemData/index.jsp>).

**Supplemental Table 3.** HLA-DQ8 pocket 6 top scoring in silico small molecules from the NIH Developmental Therapeutics Program chemical repository that were screened in vitro.

| Number | NSC Identifier* | Chemical Structure                                                                  | PubChem CID | Molecular docking score (rank) |
|--------|-----------------|-------------------------------------------------------------------------------------|-------------|--------------------------------|
| 1      | 177979          | 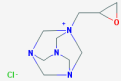   | 24195292    | -40.3<br>(#2)                  |
| 2      | 172971          |    | 6435993     | -39.9<br>(#3)                  |
| 3      | 168615          |    | 54612368    | -39.2<br>(#5)                  |
| 4      | 53040           |    | 243357      | -39.2<br>(#6)                  |
| 5      | 10408           |  | 12645659    | -38.9<br>(#7)                  |
| 6      | 172855          |  | 59114       | -38.6<br>(#8)                  |
| 7      | 667746          |  | 381308      | -38.0<br>(#9)                  |
| 8      | 30049           |  | 10355477    | -38.0<br>(#10)                 |

|    |        |                                                                                     |          |                |
|----|--------|-------------------------------------------------------------------------------------|----------|----------------|
| 9  | 325014 | 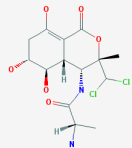   | 54676871 | -37.8<br>(#11) |
| 10 | 206142 |    | 24195918 | -36.7<br>(#13) |
| 11 | 203305 |    | 24195881 | -36.5<br>(#14) |
| 12 | 23429  |    | 54608325 | -36.5<br>(#15) |
| 13 | 155877 |   | 21144519 | -36.4<br>(#16) |
| 14 | 177977 |  | 24195291 | -35.9<br>(#17) |
| 15 | 5062   |  | 2827274  | -35.7<br>(#18) |
| 16 | 130818 |  | 279615   | -35.4<br>(#20) |
| 17 | 163897 |  | 54606769 | -35.4<br>(#21) |



|    |        |                                                                                     |          |                |
|----|--------|-------------------------------------------------------------------------------------|----------|----------------|
| 18 | 137877 |    | 283346   | -35.3<br>(#22) |
| 19 | 100731 |    | 86889    | -35.2<br>(#23) |
| 20 | 49716  |    | 54609783 | -35.1<br>(#24) |
| 21 | 259711 |    | 429590   | -34.7<br>(#25) |
| 22 | 302851 |   | 327510   | -34.4<br>(#26) |
| 23 | 404874 |  | 346598   | -34.4<br>(#27) |
| 24 | 83260  |  | 256410   | -34.3<br>(#28) |
| 25 | 179805 |  | 24195325 | -33.7<br>(#30) |
| 26 | 7308   |  | 64159    | -33.7<br>(#31) |

|    |        |                                                                                     |          |                |
|----|--------|-------------------------------------------------------------------------------------|----------|----------------|
| 27 | 621512 |    | 359895   | -33.7<br>(#32) |
| 28 | 372109 |    | 127384   | -33.6<br>(#33) |
| 29 | 4436   |    | 87571    | -33.6<br>(#34) |
| 30 | 193502 |    | 303819   | -33.5<br>(#35) |
| 31 | 134695 |   | 281808   | -33.5<br>(#36) |
| 32 | 170540 |  | 24194660 | -33.4<br>(#37) |
| 33 | 35605  |  | 54601068 | -33.4<br>(#38) |
| 34 | 124145 |  | 276387   | -33.4<br>(#39) |

\*NSC (National Service Center) identifiers for substances submitted to the National Cancer Institute, Developmental Therapeutics Program. Website to obtain further compound information (<https://ntp.cancer.gov/ntpstandard/ChemData/index.jsp>).

**Supplemental Table 4.** HLA-DQ8 pocket 9 top scoring in silico small molecules from the NIH Developmental Therapeutics Program chemical repository that were screened in vitro.

| Number | NSC Identifier* | Chemical Structure                                                                  | PubChem CID | Molecular docking score (rank) |
|--------|-----------------|-------------------------------------------------------------------------------------|-------------|--------------------------------|
| 1      | 407817          | 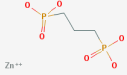   | 54607957    | -42.1 (#1)                     |
| 2      | 133881          |    | 281247      | -38.2 (#3)                     |
| 3      | 40837           |    | 80247       | -37.9 (#4)                     |
| 4      | 608071          |   | 355088      | -36.8 (#5)                     |
| 5      | 21415           |  | 228462      | -36.5 (#6)                     |
| 6      | 25950           |  | 230738      | -36.4 (#7)                     |
| 7      | 244047          |  | 54607157    | -36.2 (#8)                     |
| 8      | 101358          |  | 24190131    | -35.6 (#9)                     |

|    |        |                                                                                     |          |                |
|----|--------|-------------------------------------------------------------------------------------|----------|----------------|
| 9  | 24681  |    | 230123   | -35.4<br>(#11) |
| 10 | 18259  |    | 54605027 | -35.2<br>(#13) |
| 11 | 21371  |    | 15560    | -35.1<br>(#14) |
| 12 | 243618 |    | 428822   | -35.0<br>(#15) |
| 13 | 320310 |   | 54601833 | -34.9<br>(#18) |
| 14 | 41912  |  | 237877   | -34.9<br>(#19) |
| 15 | 8447   |  | 222467   | -34.6<br>(#20) |
| 16 | 133883 |  | 98450    | -34.5<br>(#21) |
| 17 | 72272  |  | 14308    | -34.5<br>(#22) |

|    |        |                                                                                                                                                                      |          |                |
|----|--------|----------------------------------------------------------------------------------------------------------------------------------------------------------------------|----------|----------------|
| 18 | 12861  | 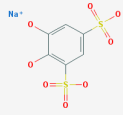 <chem>[Na+].[Na+].[O-]S(=O)(=O)c1ccc(cc1)[B-](O)(O)Oc2ccc(cc2)S(=O)(=O)[O-]</chem> | 24181945 | -34.3<br>(#24) |
| 19 | 36997  |  <chem>O=C(O)c1ccc(cc1)[B-](O)(O)Oc2ccc(cc2)C(=O)O</chem>                           | 370      | -34.1<br>(#25) |
| 20 | 4862   |  <chem>[K+].[O-]C(=O)c1ccc(cc1)S(=O)(=O)[O-]</chem>                                 | 19038728 | -34.0<br>(#27) |
| 21 | 35597  |  <chem>[Na+].[O-]S(=O)(=O)c1c(I)cc(I)c(I)c1</chem>                                  | 54605355 | -33.9<br>(#28) |
| 22 | 18262  |  <chem>[Na+].[O-]S(=O)(=O)c1ccc(cc1)[B-](O)(O)Oc2ccc(cc2)S(=O)(=O)[O-]</chem>      | 54602188 | -33.9<br>(#29) |
| 23 | 282051 |  <chem>[Na+].[O-]C(=O)c1nc2c(n1)CC(S(=O)(=O)[O-])N2</chem>                        | 54601982 | -33.9<br>(#30) |
| 24 | 9231   |  <chem>[Na+].[O-]C(=O)c1nc2c(n1)CC(S(=O)(=O)[O-])N2</chem>                        | 754      | -33.8<br>(#31) |
| 25 | 338094 |  <chem>[Na+].[O-]C(=O)c1nc2c(n1)CC(S(=O)(=O)[O-])N2</chem>                        | 333942   | -33.8<br>(#32) |
| 26 | 128066 |  <chem>[Na+].[O-]C(=O)c1nc2c(n1)CC(S(=O)(=O)[O-])N2</chem>                        | 278442   | -33.8<br>(#33) |

|      |        |                                                                                     |          |                |
|------|--------|-------------------------------------------------------------------------------------|----------|----------------|
| 27   | 7549   | 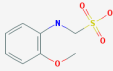   | 7126     | -33.8<br>(#34) |
| 28   | 30078  |    | 3857     | -33.7<br>(#35) |
| 29   | 89296  |    | 1016     | -33.7<br>(#36) |
| 30   | 117802 |    | 272987   | -33.6<br>(#37) |
| 31** | 127168 |   | 97488    | -33.6<br>(#38) |
| 32   | 51047  |  | 242438   | -33.6<br>(#39) |
| 33   | 133387 |  | 45072    | -33.5<br>(#40) |
| 34   | 166346 |  | 54602266 | -33.4<br>(#41) |
| 35   | 179410 |  | 301548   | -33.4<br>(#42) |

\*NSC (National Service Center) identifiers for substances submitted to the National Cancer Institute, Developmental Therapeutics Program. Website to obtain further compound information (<https://dtp.cancer.gov/dtpstandard/ChemData/index.jsp>).

\*\*Increased T-cell response in the screening assay without the addition of insulin peptide.

**Supplemental Table 5.** HLA-DQ8 pocket 6 top scoring in silico Food and Drug Administration (FDA) Approved small molecule drugs that were screened in vitro.

| Number | NSC Identifier* | Chemical Structure                                                                  | PubChem CID | Molecular docking score (rank) |
|--------|-----------------|-------------------------------------------------------------------------------------|-------------|--------------------------------|
| 1      | 61560           | 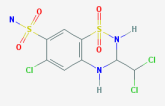   | 5560        | -32.1<br>(#1)                  |
| 2      | 25693           |    | 2720        | -28.9<br>(#2)                  |
| 3      | 169091          |    | 14676       | -27.5<br>(#4)                  |
| 4      | 270295          |   | 57004       | -27.1<br>(#5)                  |
| 5      | 9231            |  | 754         | -27.0<br>(#6)                  |
| 6      | 50381           |  | 11957506    | -26.8<br>(#7)                  |
| 7      | 27421           |  | 738         | -26.7<br>(#8)                  |
| 8      | 66259           |  | 3363        | -26.5<br>(#9)                  |



|    |        |                                                                                     |         |                |
|----|--------|-------------------------------------------------------------------------------------|---------|----------------|
| 9  | 602670 | 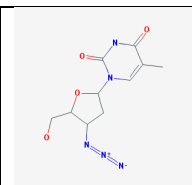   | 5726    | -26.1<br>(#10) |
| 10 | 337250 |    | 3009    | -25.7<br>(#12) |
| 11 | 355082 |    | 337359  | -25.6<br>(#13) |
| 12 | 44627  |    | 3647    | -25.4<br>(#14) |
| 13 | 65644  |   | 9859211 | -25.4<br>(#15) |
| 14 | 292267 |  | 68551   | -25.3<br>(#16) |
| 15 | 163039 |  | 5064    | -25.0<br>(#18) |
| 16 | 113595 |  | 2795    | -25.0<br>(#19) |
| 17 | 5746   |  | 5909    | -24.9<br>(#20) |

|    |        |                                                                                     |        |                |
|----|--------|-------------------------------------------------------------------------------------|--------|----------------|
| 18 | 64074  | 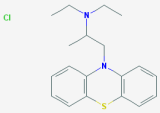   | 122824 | -24.7<br>(#21) |
| 19 | 120735 |    | 4786   | -24.5<br>(#22) |
| 20 | 62786  |    | 247704 | -24.4<br>(#23) |
| 21 | 612049 |    | 50599  | -24.2<br>(#24) |
| 22 | 8704   |   | 3728   | -24.1<br>(#26) |
| 23 | 60718  |  | 9304   | -24.1<br>(#27) |
| 24 | 169916 |  | 4138   | -23.9<br>(#28) |
| 25 | 304467 |  | 2762   | -23.8<br>(#29) |
| 26 | 27690  |  | 231285 | -23.7<br>(#30) |

|    |        |                                                                                     |       |                |
|----|--------|-------------------------------------------------------------------------------------|-------|----------------|
| 27 | 620753 | 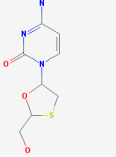   | 3877  | -23.7<br>(#31) |
| 28 | 102816 |    | 9444  | -23.6<br>(#32) |
| 29 | 7652   |    | 191   | -23.5<br>(#35) |
| 30 | 281272 |    | 1805  | -23.5<br>(#36) |
| 31 | 76130  |   | 3019  | -23.4<br>(#38) |
| 32 | 406087 |  | 9363  | -23.4<br>(#39) |
| 33 | 34652  |  | 4060  | -23.4<br>(#40) |
| 34 | 474    |  | 4837  | -23.4<br>(#41) |
| 35 | 63878  |  | 63878 | -23.3<br>(#42) |

|    |        |                                                                                   |      |                |
|----|--------|-----------------------------------------------------------------------------------|------|----------------|
| 36 | 169108 | 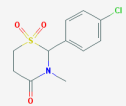 | 2717 | -23.1<br>(#45) |
| 37 | 110364 |  | 4628 | -23.1<br>(#47) |
| 38 | 3074   |  | 9048 | -23.0<br>(#48) |
| 39 | 118368 |  | 836  | -23.0<br>(#51) |

\*NSC (National Service Center) identifiers for substances submitted to the National Cancer Institute, Developmental Therapeutics Program. Website to obtain further compound information (<https://dtp.cancer.gov/dtpstandard/ChemData/index.jsp>).

**Supplemental Table 6.** Structure of Methyl dopa and Derivatives

| Chemical Structure and Name*                                                                                                                                                                         | Clone 5<br>(insulin/DQ8) | 489<br>( $\alpha$ -gliadin/DQ8) |
|------------------------------------------------------------------------------------------------------------------------------------------------------------------------------------------------------|--------------------------|---------------------------------|
| 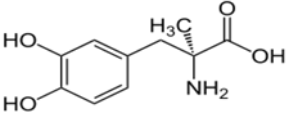 <p><math>\alpha</math>-methyl dopa,<br/>2-amino-3-(3,4-dihydroxyphenyl)-2-methylpropanoic acid</p>                 | Inhibition               | Inhibition                      |
|  <p><math>\alpha</math>-methylphenylalanine,<br/>2-amino-2-methyl-3-phenylpropanoic acid</p>                        | No inhibition            | No inhibition                   |
|  <p><math>\alpha</math>-methyltyrosine,<br/>2-amino-3-(4-hydroxyphenyl)-2-methylpropanoic acid</p>                  | No inhibition            | No inhibition                   |
|  <p>3-O-methyl methyl dopa,<br/>2-amino-3-(4-hydroxy-3-methoxyphenyl)propanoic acid</p>                           | No inhibition            | No inhibition                   |
|  <p><math>\alpha</math>-methyl dopa ethyl ester,<br/>Ethyl-2-amino-3-(3,4 dihydroxyphenyl)-2-methylpropanoate</p> | Inhibition               | Inhibition                      |
|  <p><math>\alpha</math>-methylnorepinephrine,<br/>4-(2-amino-1-hydroxypropyl)benzene-1,2-diol</p>                 | No Inhibition            | No inhibition                   |

\*Common chemical name followed by International Union of Pure and Applied Chemistry (IUPAC) name.

**Supplemental Table 7.** Study Subject Demographics, Completion of Visits, Islet Autoantibody Status, and HLA Type

| ID  | Age (yrs) | Sex | T1D Duration (days) | Study Visits* |   |   |   |    |   | Islet AutoAb** |      |       |       | HLA Type*** |                    |                    |          |                    |                    | DQ  | DR   |
|-----|-----------|-----|---------------------|---------------|---|---|---|----|---|----------------|------|-------|-------|-------------|--------------------|--------------------|----------|--------------------|--------------------|-----|------|
|     |           |     |                     | 1             | 2 | 3 | 4 | 5  | 6 | GAD            | IA-2 | IAA   | ZnT8  | Allele 1    |                    |                    | Allele 2 |                    |                    |     |      |
|     |           |     |                     |               |   |   |   |    |   |                |      |       |       | DRB1        | DQA1               | DQB1               | DRB1     | DQA1               | DQB1               |     |      |
| 003 | 25        | M   | 210                 | X             | X | X | X | X  | X | 96             | 3    | 0.279 | 0.002 | 0401        | <u><b>0301</b></u> | <u><b>0302</b></u> | 0401     | <u><b>0301</b></u> | <u><b>0302</b></u> | 8/8 | 4/4  |
| 006 | 23        | M   | 148                 | X             | X | X | X | X  | X | 71             | 2    | 0.015 | 0.039 | 0404        | <u><b>0301</b></u> | <u><b>0302</b></u> | 0701     | 0201               | 0202               | 8/2 | 4/7  |
| 007 | 43        | F   | 103                 | X             | X | X | X | X  | X | 126            | 205  | 0.077 | 0.065 | 0401        | <u><b>0301</b></u> | <u><b>0302</b></u> | 0701     | 0201               | 0303               | 8/9 | 4/7  |
| 008 | 23        | M   | 40                  | X             | X | X | X | X  | X | 144            | 16   | 0.002 | 0.001 | 0301        | 0501               | 0201               | 0401     | <u><b>0301</b></u> | <u><b>0302</b></u> | 2/8 | 3/4  |
| 009 | 20        | M   | 50                  | X             | X | X | X | X  | X | 16             | 201  | 0.003 | 0.709 | 0102        | 0101               | 0501               | 0401     | <u><b>0301</b></u> | <u><b>0302</b></u> | 5/8 | 1/4  |
| 011 | 21        | F   | 25                  | X             | X | X | X | X  | X | 921            | 368  | 0.035 | 0.095 | 0401        | <u><b>0301</b></u> | <u><b>0302</b></u> | 1302     | 0102               | 0604               | 8/6 | 4/13 |
| 012 | 20        | M   | 43                  | X             | X | X | X | X  | X | 99             | 311  | 0.002 | 0.239 | 0301        | 0501               | 0201               | 0401     | <u><b>0301</b></u> | <u><b>0302</b></u> | 2/8 | 3/4  |
| 014 | 25        | F   | 122                 | X             | X | X | X | X  | X | 885            | 116  | 0.092 | 0.001 | 0411        | <u><b>0301</b></u> | <u><b>0302</b></u> | 1602     | 0505               | 0301               | 8/7 | 4/16 |
| 015 | 28        | M   | 105                 | X             | X | X | X | X  | X | 707            | 432  | 0.482 | 0.671 | 0302        | 0501               | 0203               | 0405     | <u><b>0303</b></u> | <u><b>0302</b></u> | 2/8 | 3/4  |
| 016 | 42        | F   | 141                 | X             | X | X | X | X  | X | 673            | 382  | 0.001 | 0.323 | 0301        | 0501               | 0201               | 0401     | <u><b>0301</b></u> | <u><b>0302</b></u> | 2/8 | 3/4  |
| 018 | 18        | M   | 65                  | X             | X | X | X | X  | X | 7              | 215  | 0.001 | 0.073 | 0401        | <u><b>0301</b></u> | <u><b>0302</b></u> | 0401     | <u><b>0301</b></u> | <u><b>0302</b></u> | 8/8 | 4/4  |
| 019 | 20        | F   | 73                  | X             | X | X | X | X  | X | 496            | 0    | 0.001 | 0     | 0301        | 0501               | 0201               | 0402     | <u><b>0301</b></u> | <u><b>0302</b></u> | 2/8 | 3/4  |
| 022 | 23        | M   | 21                  | X             | X | X | X | X  | X | 15             | 0    | 0.02  | 0.009 | 0401        | <u><b>0301</b></u> | <u><b>0302</b></u> | 0404     | <u><b>0301</b></u> | <u><b>0302</b></u> | 8/8 | 4/4  |
| 023 | 33        | F   | 566                 | X             | X | X | X | X  | X | 7              | 102  | 2.224 | 0.007 | 0101        | 0101               | 0501               | 0401     | <u><b>0301</b></u> | <u><b>0302</b></u> | 5/8 | 1/4  |
| 024 | 19        | M   | 92                  | X             | X | X | X | X  | X | 0              | 326  | 0.004 | 0.005 | 0101        | 0101               | 0501               | 0401     | <u><b>0301</b></u> | <u><b>0302</b></u> | 5/8 | 1/4  |
| 025 | 19        | F   | 486                 | X             | X | X | X | X  | X | 71             | 174  | 0.071 | 0.023 | 0405        | <u><b>0301</b></u> | <u><b>0302</b></u> | 1316     | 0102               | 0604               | 8/6 | 4/6  |
| 026 | 35        | M   | 159                 | X             | X | X | X | X  | X | 119            | 0    | 0.978 | 0.000 | 0405        | <u><b>0301</b></u> | <u><b>0302</b></u> | 0701     | 0201               | 0202               | 8/2 | 4/7  |
| 027 | 20        | M   | 53                  | X             | X | X | X | -- | X | 45             | 0    | 0.001 | 0.003 | 0401        | <u><b>0301</b></u> | <u><b>0302</b></u> | 0404     | <u><b>0301</b></u> | <u><b>0302</b></u> | 8/8 | 4/4  |
| 028 | 20        | M   | 78                  | X             | X | X | X | X  | X | 469            | 190  | 0.002 | 0.294 | 0301        | 0501               | 0201               | 0401     | <u><b>0301</b></u> | <u><b>0302</b></u> | 2/8 | 3/4  |
| 029 | 18        | M   | 88                  | X             | X | X | X | X  | X | 38             | 61   | 0.105 | 0.021 | 0404        | <u><b>0301</b></u> | <u><b>0302</b></u> | 0801     | 0401               | 0402               | 8/4 | 4/8  |

\*X denotes a completed study visit.

\*\*Values highlighted in yellow denote positive values, normal values:

Glutamic Acid Decarboxylase (GAD) < 20 DK Units

Islet Antigen 2 (IA-2) < 5 DK Units

Insulin (IAA) < 0.011

Zinc Transporter 8 (ZnT8) < 0.021

\*\*\*Underlined and bolded alleles represent HLA-DQ8.

**Supplemental Table 8.** IFN- $\gamma$  ELISPOT responses to an insulin B chain mimotope, tetanus toxin and peptides

| Subject ID* | IFN- $\gamma$ Total ELISPOTS |               |     |            |            |          |               |     |            |            |
|-------------|------------------------------|---------------|-----|------------|------------|----------|---------------|-----|------------|------------|
|             | Baseline                     |               |     |            |            | 3 Months |               |     |            |            |
|             | No Ag                        | B:9-23 (B22E) | TT  | TT 506-525 | TT 922-941 | No Ag    | B:9-23 (B22E) | TT  | TT 506-525 | TT 922-941 |
| 007         | 9                            | 25            | 83  | 17         | 17         | 1        | 1             | 4   | 1          | 5          |
| 014         | 0                            | 21            | 19  | 2          | 6          | 6        | 11            | 35  | 4          | 75         |
| 015         | 14                           | 42            | 332 | 10         | 101        | 8        | 18            | 196 | 8          | 72         |
| 022         | 0                            | 5             | 2   | 96         | 8          | 5        | 6             | 183 | 62         | 61         |
| 023         | 24                           | 51            | 264 | 51         | 101        | 41       | 49            | 407 | 82         | 276        |
| 025         | 2                            | 9             | 38  | 0          | 5          | 32       | 32            | 62  | 32         | 55         |
| 026         | 4                            | 15            | 76  | 7          | 8          | 3        | 4             | 94  | 5          | 10         |

\*Only those subjects responding to the insulin B:9-23 (B22R $\rightarrow$ E) mimotope at baseline were evaluated for responses to whole TT protein and peptides.

**Supplemental Table 9.** Individual TCR transductants, peptide and MHC restriction

| TCR Transductant | Peptide and Amino Acid Sequence                       | MHC Class II Molecule |
|------------------|-------------------------------------------------------|-----------------------|
| Clone 5          | Insulin B:13-23<br>EALYLVCGERG                        | DQ8                   |
| 489              | $\alpha$ -gliadin <sub>228-240</sub><br>SGEGSFQPSQENP | DQ8                   |
| Clone 13         | $\alpha$ -gliadin <sub>228-240</sub><br>SGEGSFQPSQENP | DQ8                   |
| Clone 22         | $\alpha$ -gliadin <sub>228-240</sub><br>SGEGSFQPSQENP | DQ8                   |
| Clone 38         | $\alpha$ -gliadin <sub>228-240</sub><br>SGEGSFQPSQENP | DQ8                   |
| DQ8-flu          | HA <sub>102-118</sub><br>PENGTCYPGYFADYEEL            | DQ8                   |
| C7CH17           | HA <sub>306-318</sub><br>PKYVKQNTLKLAT                | DR4                   |
| 233              | a-II-gliadin <sub>62-73</sub><br>PQPELPYPQPQL         | DQ2                   |

\*Bold amino acid represents a Q→E deamidation in  $\alpha$ -gliadin.



**Supplemental Table 10.** Flow cytometry antibody clones and suppliers

| <b>Antigen</b> | <b>Clone</b> | <b>Manufacturer</b> |
|----------------|--------------|---------------------|
| CD19           | HIB19        | BD                  |
| HLA-DR         | TU36         | BD                  |
| HLA-DR         | G46-6        | BD                  |
| HLA-DQ         | SK10         | eBioscience         |
| CD11c          | S-HCL-3      | BD                  |
| CD11c          | 3.9          | BioLegend           |
| CD123          | 6H6          | BioLegend           |
| CD1c (BDCA-1)  | L61          | BioLegend           |
| CD303 (BDCA-2) | 201A         | BioLegend           |
| CD141 (BDCA-3) | M80          | BioLegend           |
| CD304 (BDCA-4) | 12C2         | BioLegend           |
| CD4            | RPA-T4       | BioLegend           |
| CD8            | SK1          | BioLegend           |

BDCA = blood dendritic cell antigen
